# Supplementary material for: Construction of a CuInS2/La2Ti2O7 heterojunction for highly efficient hydrogen evolution
Source: Royal Society of Chemistry journal article supplement (doi:10.1039/d2ce01412b), 2022-12-15
Supplement: d2ce01412b1.pdf [file d2ce01412b1.pdf]

## Construction of $\text{CuInS}_2/\text{La}_2\text{Ti}_2\text{O}_7$ heterojunction for highly efficient hydrogen evolution

Wenning Zhao,<sup>a</sup> Haodong Wen<sup>a</sup> and Xiuxun Han<sup>\*a</sup>

<sup>a</sup> Institute of Optoelectronic Materials and Devices, Faculty of Materials Metallurgy and Chemistry, Jiangxi University of Science and Technology, Ganzhou 341000, China.

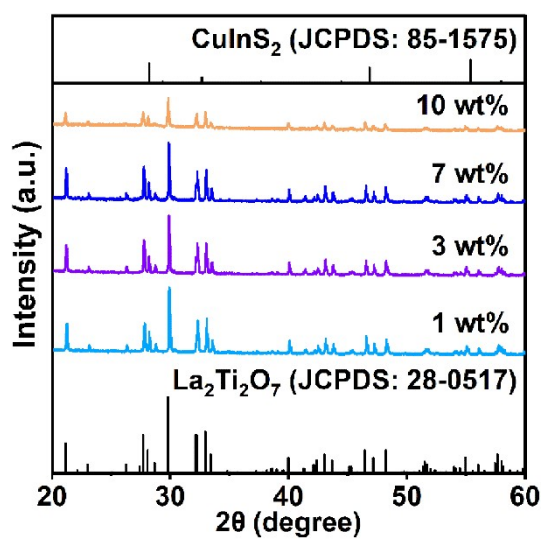

Fig. S1 XRD patterns of composites with different loading amount.

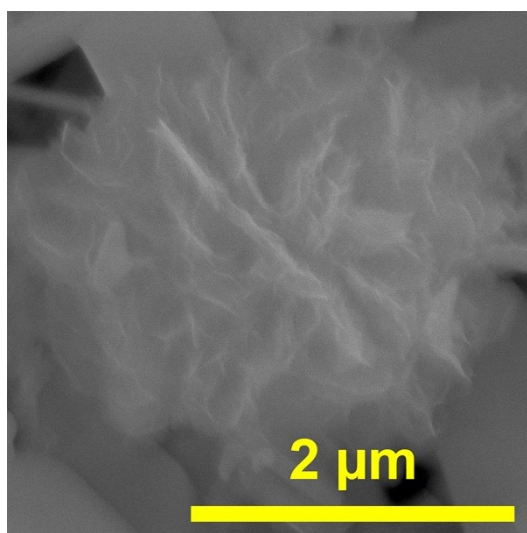

Fig. S2 SEM image of composite (10 wt%  $\text{CuInS}_2/\text{La}_2\text{Ti}_2\text{O}_7$ ).

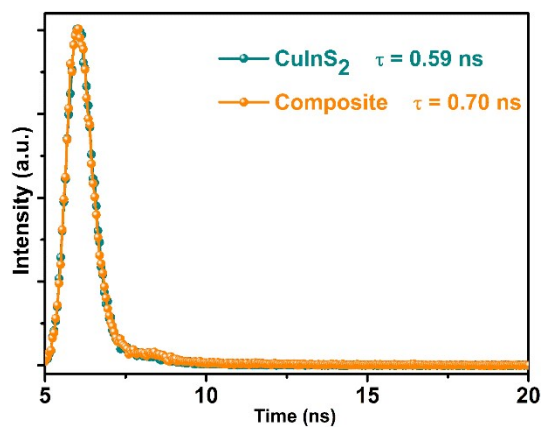

**Fig. S3** Time-resolved photoluminescence (TRPL) spectra of  $\text{CuInS}_2$  and  $\text{CuInS}_2/\text{La}_2\text{Ti}_2\text{O}_7$  composite.

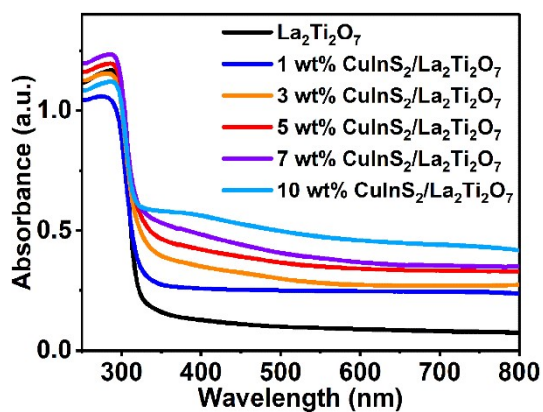

**Fig. S4** Absorption spectra of composites with different loading amount.

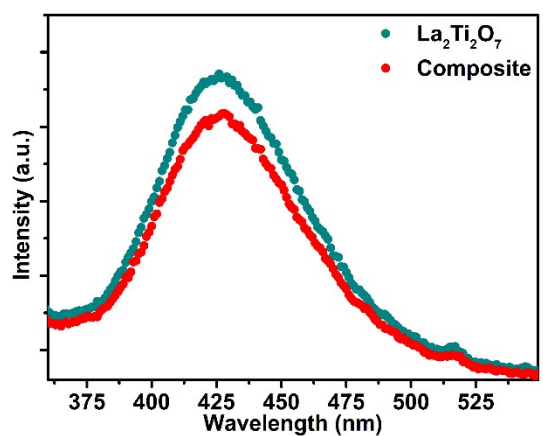

**Fig. S5** PL spectra of  $5 \times 10^{-4}$  M basic TA solutions with different photocatalysts ( $\text{La}_2\text{Ti}_2\text{O}_7$  and 5 wt%  $\text{CuInS}_2/\text{La}_2\text{Ti}_2\text{O}_7$ ), after irradiating with a Xenon lamp for 5 min (excitation at  $\lambda = 315$  nm).
